# Supplementary material for: Long-Term Tea Consumption Is Associated with Reduced Risk of Diabetic Retinopathy: A Cross-Sectional Survey among Elderly Chinese from Rural Communities
Source: J Diabetes Res. 2020 Jul 12;2020:1860452. doi: 10.1155/2020/1860452 (PMC7372293; doi:10.1155/2020/1860452)
Supplement: Supplementary Materials — Table S1: comparison of subjects included and excluded from the analysis. [file 1860452.f1.pdf]

## Supplementary materials

**Table S1.** Comparison of subjects included and excluded from the analysis

|                             |              |       | Excluded     |       | Included     |       |                |
|-----------------------------|--------------|-------|--------------|-------|--------------|-------|----------------|
|                             | N = 614      | %     | N = 94       | %     | N = 520      | %     | <i>p</i>       |
| Age, y                      | 68.03 ± 6.48 |       | 73.47 ± 6.44 |       | 67.05 ± 5.99 |       | < <b>0.001</b> |
| Gender                      |              |       |              |       |              |       |                |
| Male                        | 279          | 45.44 | 38           | 40.43 | 241          | 46.35 | 0.289          |
| Female                      | 335          | 54.56 | 56           | 59.57 | 279          | 53.65 |                |
| Occupation                  |              |       |              |       |              |       |                |
| Peasant                     | 346          | 56.35 | 61           | 64.89 | 285          | 54.81 | 0.070          |
| Other                       | 268          | 43.65 | 33           | 35.11 | 235          | 45.19 |                |
| Educational level           |              |       |              |       |              |       |                |
| Illiterate or no education  | 295          | 48.05 | 56           | 59.57 | 239          | 45.96 | <b>0.015</b>   |
| Primary education and above | 319          | 51.95 | 38           | 40.43 | 281          | 54.04 |                |
| Individual monthly income   |              |       |              |       |              |       |                |
| ≤ ¥2000                     | 486          | 79.15 | 80           | 85.11 | 406          | 78.08 | 0.123          |
| > ¥2000                     | 128          | 20.85 | 14           | 14.89 | 114          | 21.92 |                |
| Diabetes diagnosis          |              |       |              |       |              |       |                |
| Newly                       | 173          | 28.18 | 36           | 38.30 | 137          | 26.35 | <b>0.018</b>   |
| Previously                  | 441          | 71.82 | 58           | 61.70 | 383          | 73.65 |                |
| Duration of diabetes, y     | 5.64 ± 6.24  |       | 6.91 ± 8.18  |       | 5.41 ± 5.80  |       | <b>0.031</b>   |
| Smoking                     |              |       |              |       |              |       |                |
| No                          | 481          | 78.34 | 79           | 84.04 | 402          | 77.31 | 0.145          |
| Yes                         | 133          | 21.66 | 15           | 15.96 | 118          | 22.69 |                |
| Alcohol consumption         |              |       |              |       |              |       |                |

|                                |               |       |               |       |               |       |       |
|--------------------------------|---------------|-------|---------------|-------|---------------|-------|-------|
| No                             | 484           | 78.83 | 80            | 85.11 | 404           | 77.69 |       |
| Yes                            | 130           | 21.17 | 14            | 14.89 | 116           | 22.31 | 0.105 |
| Type of tea consumption        |               |       |               |       |               |       |       |
| Non-tea consumption            | 395           | 64.33 | 64            | 68.09 | 331           | 63.65 |       |
| Green tea                      | 196           | 31.92 | 28            | 29.79 | 168           | 32.31 |       |
| Other                          | 23            | 3.75  | 2             | 2.13  | 21            | 4.04  | 0.313 |
| Frequency of tea consumption   |               |       |               |       |               |       |       |
| Non-tea consumption            | 395           | 64.33 | 64            | 68.09 | 331           | 63.65 |       |
| 1 – 5 times/week               | 199           | 32.41 | 29            | 30.85 | 170           | 32.69 |       |
| > 5 times/week                 | 20            | 3.26  | 1             | 1.06  | 19            | 3.65  | 0.255 |
| Duration of tea consumption, y | 10.99 ± 17.73 |       | 11.66 ± 20.31 |       | 10.87 ± 17.73 |       | 0.690 |

---

Bold type indicates statistical significance ( $p < 0.05$ ).

Data presented are means (standard deviations) or number (%), as appropriate for the variable.

Subjects included in the analysis were younger ( $p < 0.001$ ); more likely to be previously diagnosed with diabetes ( $p = 0.018$ ); and with higher education levels ( $p = 0.015$ ) and shorter duration of diabetes ( $p = 0.031$ ). There was little difference between the two groups in the variables related to tea consumption, gender, occupation, individual monthly income, the status of smoking and alcohol consumption (all  $p > 0.05$ ).
